# Supplementary material for: Реакции гидролиза и обмена при действии импульсных электрических разрядов на границу раздела фаз металл растворы солей
Source: Oxford University Press journal article supplement (doi:10.1093/aje/kwaa093), 2009-01-01
Supplement: kwaa093_risch_web_material_final.pdf [file kwaa093_risch_web_material_final.pdf]

## WEB MATERIAL

### **Early Outpatient Treatment of Symptomatic, High-Risk Coronavirus 19 Patients That Should Be Ramped Up Immediately as Key to the Pandemic Crisis**

Harvey A. Risch

Department of Chronic Disease Epidemiology, Yale School of Public Health, New Haven,  
Connecticut

Correspondence to Dr. Harvey A. Risch, Department of Chronic Disease Epidemiology, Yale  
School of Public Health, P.O. Box 208034, New Haven, CT 06520-8034 (e-mail:  
harvey.risch@yale.edu).

#### Contents

|                                                                                                                                             |   |
|---------------------------------------------------------------------------------------------------------------------------------------------|---|
| Web Table 1. Randomized Controlled Trials of Hydroxychloroquine Plus<br>Azithromycin in Outpatients, Registered at ClinicalTrials.gov ..... | 2 |
| Web Appendix. General Contraindications for Use of Hydroxychloroquine<br>Plus Azithromycin Together .....                                   | 3 |
| References .....                                                                                                                            | 4 |

| <b>Web Table 1. Randomized Controlled Trials of Hydroxychloroquine Plus Azithromycin in Outpatients, Registered at ClinicalTrials.gov</b> |                                                     |                                                                     |                                      |                        |
|-------------------------------------------------------------------------------------------------------------------------------------------|-----------------------------------------------------|---------------------------------------------------------------------|--------------------------------------|------------------------|
| <b>Trial No.</b>                                                                                                                          | <b>Location</b>                                     | <b>Current Status</b>                                               | <b>Planned Enrollment Completion</b> | <b>Planned Results</b> |
| NCT04371406                                                                                                                               | Paris, France                                       | Recruiting                                                          | August 2, 2020                       | September 2, 2020      |
| NCT04354428                                                                                                                               | Multisite US, based at the University of Washington | Recruiting                                                          | End of July 2020                     | October 2020           |
| NCT04370782                                                                                                                               | St. Francis Hospital, Roslyn, New York              | Recruitment of patients presenting at emergency room; starting soon | September 30, 2020                   | October 2020           |
| NCT04324463                                                                                                                               | Hamilton, Ontario, Canada                           | Recruiting                                                          | September 30, 2020                   | December 2020          |
| NCT04358068                                                                                                                               | Multisite US, based at UCLA and UCSD                | Recruitment starting soon                                           | October 9, 2020                      | March 2021             |

Abbreviations: UCLA, University of California, Los Angeles; UCSD, University of California, San Diego; US, United States.

## WEB APPENDIX

### General Contraindications for Use of Hydroxychloroquine Plus Azithromycin Together

Some patients may have contraindications for taking hydroxychloroquine + azithromycin together. Typical contraindications include: history of QT prolongation or cardiac arrhythmia, psoriasis, porphyria, hepatic disease, alcoholism, G6PD deficiency, HIV, neurological diseases with myopathy, seizure disorders, women breastfeeding, hypoglycemia or diabetes mellitus, uncorrected hypocalcemia, hypokalemia or hypomagnesemia, hypothyroidism, history of myocardial infarction or cardiac failure, and various interacting medications including diuretics, antifungals, etc. (1). Some patients with these conditions may be able to take HCQ + doxycycline safely. All of these circumstances need to be evaluated by treating physicians, who may elect to obtain screening ECGs prior to treatment and at some point or points during treatment if indicated. Portable cell-phone-based FDA-approved ECG sensors with QTc functionality are available (2, 3) and could be loaned out on an outpatient basis and mailed back in and disinfected.

## References

1. PDR | Prescribers' Digital Reference. Hydroxychloroquine sulfate—drug summary. <https://www.pdr.net/drug-summary/Plaquenil-hydroxychloroquine-sulfate-1911>. Accessed May 10, 2020.
2. Giudicessi JR, Noseworthy PA, Friedman PA, et al. Urgent guidance for navigating and circumventing the QTc-prolonging and torsadogenic potential of possible pharmacotherapies for coronavirus disease 19 (COVID-19). *Mayo Clin Proc*. 2020;95(6):1213–1221.
3. AliveCor. ATTENTION: Clinicians may now use KardiaMobile 6L to monitor QTc in patients being treated for COVID-19. <https://clinicians.alivecor.com/>. Accessed May 11, 2020.
